# Supplementary material for: Comparative Genomic Study of blaKPC-2-Carrying Multidrug-Resistant Klebsiella pneumoniae in the United Arab Emirates
Source: Research Square preprint supplement (doi:10.21203/rs.3.rs-7111183/v1), 2025-08-01

Supplementary Table 1: Antibiotic susceptibility profile of the *bla*KPC-2 isolates. Red refers to resistant bacteria, yellow refers to intermediate bacteria, and green refers to susceptible bacteria.

| **Strain** | **AMP/SUL** | **PIP/TAZ** | **CTX** | **CAZ** | **CAZ/AVI** | **CEF/TAZ** | **CPM** | **IMI** | **MEM** | **AK** | **GM** | **CIP** | **TIG** | **COL** | **TRIM/SULFA** |
| --- | --- | --- | --- | --- | --- | --- | --- | --- | --- | --- | --- | --- | --- | --- | --- |
| CRE51 | ≥32 | ≥128 | ≥64 | ≥64 | 2 | ≥32 | ≥32 | ≥16 | ≥16 | ≥64 | ≥16 | ≥4 | ≤0.5 | ≤0.5 | ≤20 |
| CRE79 | ≥32 | ≥128 | ≥64 | 32 | 0.25 | 8 | ≥32 | 8 | ≥16 | 4 | ≥16 | ≥4 | ≤0.5 | ≤0.5 | ≥320 |
| CRE93 | ≥32 | ≥128 | ≥64 | ≥64 | 1 | ≥32 | ≥32 | ≥16 | ≥16 | 32 | ≥16 | ≥4 | 2 | 8 | ≥320 |

AMP/SUL: ampicillin/sulbactam, PIP/TAZ: piperacillin/tazobactam, CTX: cefotaxime, CAZ: ceftazidime, CAZ/AVI: ceftazidime/sulbactam, CEF/TAZ: ceftolozane/tazobactam, CPM: cefepime, IMI: imipenem, MEM: meropenem, AK: amikacin, GM: gentamicin, CIP: ciprofloxacin, TIG: tigecycline, COL: colistin and TRIM/SULFA: cotrimoxazole.

Supplementary Table 2: Summary of assembly metrics for draft genomes of all isolates.

| **Strain Name** | **Genome Size** | **Contigs** | **GC content** | **Contig L50** | **Contig N50** | **CDS** | **tRNA** |
| --- | --- | --- | --- | --- | --- | --- | --- |
| CRE51 | 5,544,385 bp | 206 | 57.35 | 13 | 151,791 bp | 5568 | 92 |
| CRE79 | 5,652,409 bp | 255 | 56.99 | 10 | 197,590 bp | 5739 | 93 |
| CRE93 | 5,697,987 bp | 179 | 56.98 | 8 | 248,865 bp | 5722 | 92 |
| PFZ360 | 5,674,130 bp | 122 | 57.00 | 7 | 338,348 bp | 5678 | 74 |
| PFZ363 | 5,673,315 bp | 121 | 56.99 | 5 | 355,015 bp | 5678 | 74 |
| PFZ401 | 5,587,687 bp | 107 | 57.08 | 11 | 191,656 bp | 5500 | 76 |
| PFZ410 | 5,587,846 bp | 106 | 57.08 | 11 | 198,531 bp | 5503 | 76 |
| PFZ529 | 5,699,652 bp | 135 | 57.10 | 12 | 175,911 bp | 5736 | 75 |
| PFZ758 | 5,879,460 bp | 138 | 56.75 | 6 | 372,348 bp | 5945 | 74 |
| ABC220 | 5,670,590 bp | 117 | 57.15 | 10 | 188,533 bp | 5564 | 71 |

Supplementary Table 3. Virulence factor profiles of *bla*KPC-2-producing isolates. This table provides a detailed summary of the virulence factors detected in *bla*KPC-2-producing isolates, including capsule types (K-loci), adherence mechanisms (fimbriae, pili), antiphagocytosis factors, iron uptake systems, secretion systems, serum resistance, toxins, and other virulence-associated determinants.

| Virulence Factors | Related genes | ABC220 | PFZ360 | PFZ363 | PFZ401 | PFZ410 | PFZ529 | PFZ758 | CRE51 | CRE79 | CRE93 |
| --- | --- | --- | --- | --- | --- | --- | --- | --- | --- | --- | --- |
| K- locus | - | KL2 | KL51 | KL51 | KL19 | KL19 | KL64 | KL62 | KL47 | KL111 | KL51 |
| Adherence |  |  |  |  |  |  |  |  |  |  |  |
| [Type I fimbriae](javascript:void(0)) | 10 | + | + | + | + | + | + | + | + | + | + |
| [Type 3 fimbriae](javascript:void(0)) | 8 | + | ± | + | + | + | + | + | + | + | + |
| [Type IV pili (Yersinia)](javascript:void(0)) | 12 | ± | + | ± | - | - | - | - | ± | - | ± |
| Antiphagocytosis (1 Item) |  |  |  |  |  |  |  |  |  |  |  |
| [Capsule](javascript:void(0)) | 1 | + | + | + | + | + | + | + | + | + | + |
| Efflux pump (1 Item) |  |  |  |  |  |  |  |  |  |  |  |
| [AcrAB](javascript:void(0)) | 2 | + | + | + | + | + | + | + | + | + | + |
| Iron uptake (6 Items) |  |  |  |  |  |  |  |  |  |  |  |
| [Yersiniabactin](javascript:void(0)) | 11 | + | + | + | + | + | + | ± | + | - | + |
| [Salmochelin](javascript:void(0)) | 5 | ± | ± | ± | ± | ± | ± | + | ± | ± | ± |
| [Ent siderophore](javascript:void(0)) | 13 | + | + | + | + | + | + | + | + | + | + |
| [Aerobactin](javascript:void(0)) | 5 | ± | + | + | ± | ± | + | + | ± | ± | + |
| [Ferrous iron transport (Shigella)](https://ncbi.nlm.nih.gov/pubmed/?term=16718602;) | 4 | - | ± | ± | - | ± | - | - | - | - | ± |
| [Iron/manganese transport (Escherichia)](https://ncbi.nlm.nih.gov/pubmed/?term=16514154;) | 4 | - | + | + | - | - | - | - | - | - | ± |
| Nutritional factor (1 Item) |  |  |  |  |  |  |  |  |  |  |  |
| [Allantoin utilization](javascript:void(0)) | 6 | - | - | - | - | - | - | - | - | - | - |
| Regulation (2 Items) |  |  |  |  |  |  |  |  |  |  |  |
| [RmpA](javascript:void(0)) | 1 | - | - | - | - | - | - | - | - | - | - |
| [RcsAB](javascript:void(0)) | 2 | + | + | + | + | + | + | + | + | + | + |
| Secretion system (3 Items) |  |  |  |  |  |  |  |  |  |  |  |
| [T6SS-III](https://ncbi.nlm.nih.gov/pubmed/?term=20932940) | 18 | ± | ± | ± | ± | ± | ± | ± | ± | ± | ± |
| [T6SS-II](https://ncbi.nlm.nih.gov/pubmed/?term=20932940) | 10 | ± | ± | ± | ± | ± | ± | ± | ± | ± | ± |
| [T6SS-I](javascript:void(0)) | 18 | ± | ± | ± | ± | ± | ± | ± | + | ± | ± |
| [Hcp secretion island-1 encoded type VI secretion](javascript:void(0)) | 21 | - | - | - | - | - | - | - | - | ± | - |
| [Lvh (Legionella vir homologs) type IVA secretion](https://ncbi.nlm.nih.gov/pubmed/?term=17101653;10564519;) | 11 | - | - | - | - | - | - | - | - | ± | - |
| Serum resistance (1 Item) |  |  |  |  |  |  |  |  |  |  |  |
| [LPS rfb locus](javascript:void(0)) | 1 | + | + | + | + | + | + | + | + | + | + |
| Toxin (1 Item) |  |  |  |  |  |  |  |  |  |  |  |
| [Colibactin](javascript:void(0)) | 18 | - | - | - | - | - | - | - | - | - | - |
| Fimbrial adherence determinants (1 Item) |  |  |  |  |  |  |  |  |  |  |  |
| [Stb (Salmonella)](https://ncbi.nlm.nih.gov/pubmed/?term=15908362;) | 5 | - | ± | + | - | - | - | - | - | - | ± |
| Autotransporter (1 Item) |  |  |  |  |  |  |  |  |  |  |  |
| [Antigen 43, AIDA-I type (Escherichia)](https://ncbi.nlm.nih.gov/pubmed/?term=17610513;17030570;) | 1 | - | - | - | + | + | - | - | - | - | - |
| [Temperature-sensitive hemagglutinin](javascript:void(0)) | 1 | - | - | - | - | - | - | + | - | - | - |
| Protease (1 Item) |  |  |  |  |  |  |  |  |  |  |  |
| [Pla](javascript:void(0)) | 1 | - | - | - | - | - | - | - | - | + | - |

Supplementary Figure 1: Plasmid profiles and Southern blot analysis for *bla*KPC-2 gene. (1) Agarose gel electrophoresis showing plasmid profiles for *bla*KPC-2 carrying isolates. *E. coli* strain 39R861 was used as a size marker control, *E. coli* strain J53RAZ used as a negative control. (2) Southern blot of the same gel hybridized with *bla*KPC probe.


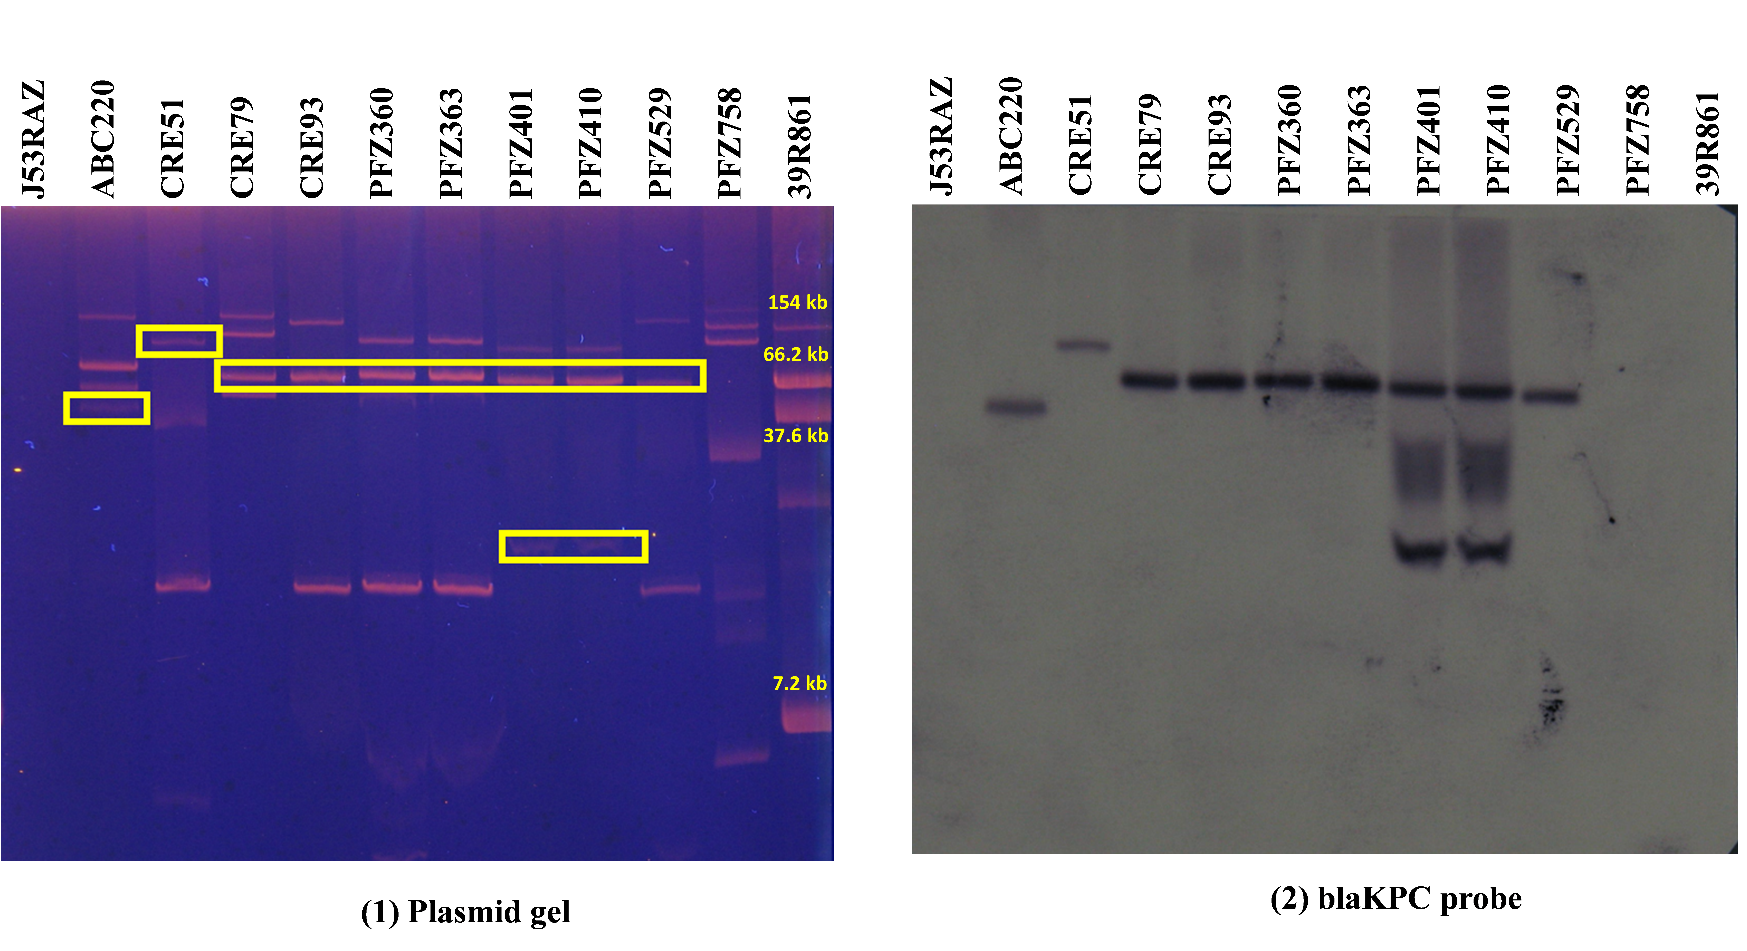


Supplementary Figure 2: Genomic characterization of blaKPC-2-carrying isolates and accompanying plasmids. A) Sequence comparison of reconstructed blaKPC-2-positive plasmids from a whole-genome sequence of *K. pneumoniae* *CRE_*51 with *K. pneumoniae* KP1034 and 16HN-263 plasmids. B) Sequence comparison of reconstructed blaKPC-2-positive plasmids from a whole-genome sequence of *K. pneumoniae* *CRE_*79 with *K. pneumoniae* pKPC2 (CP061353.1), pKPC2_1332 (CP063432.1) and pKPC2_sg1 (MN542377.1) plasmids. C) Sequence comparison of reconstructed blaKPC-2-positive plasmids from whole-genome sequences of *K. pneumoniae* CRE_93, PFZ360, PFZ363, PFZ401 and PFZ410 with the *K. pneumoniae* BA33875 plasmid. D) Sequence comparison of reconstructed blaKPC-2-positive plasmids from the whole-genome sequence of *K. pneumoniae* PFZ529 with those of *K. pneumoniae* BJ108KPC and CR-hvkP005-KPC-P1.


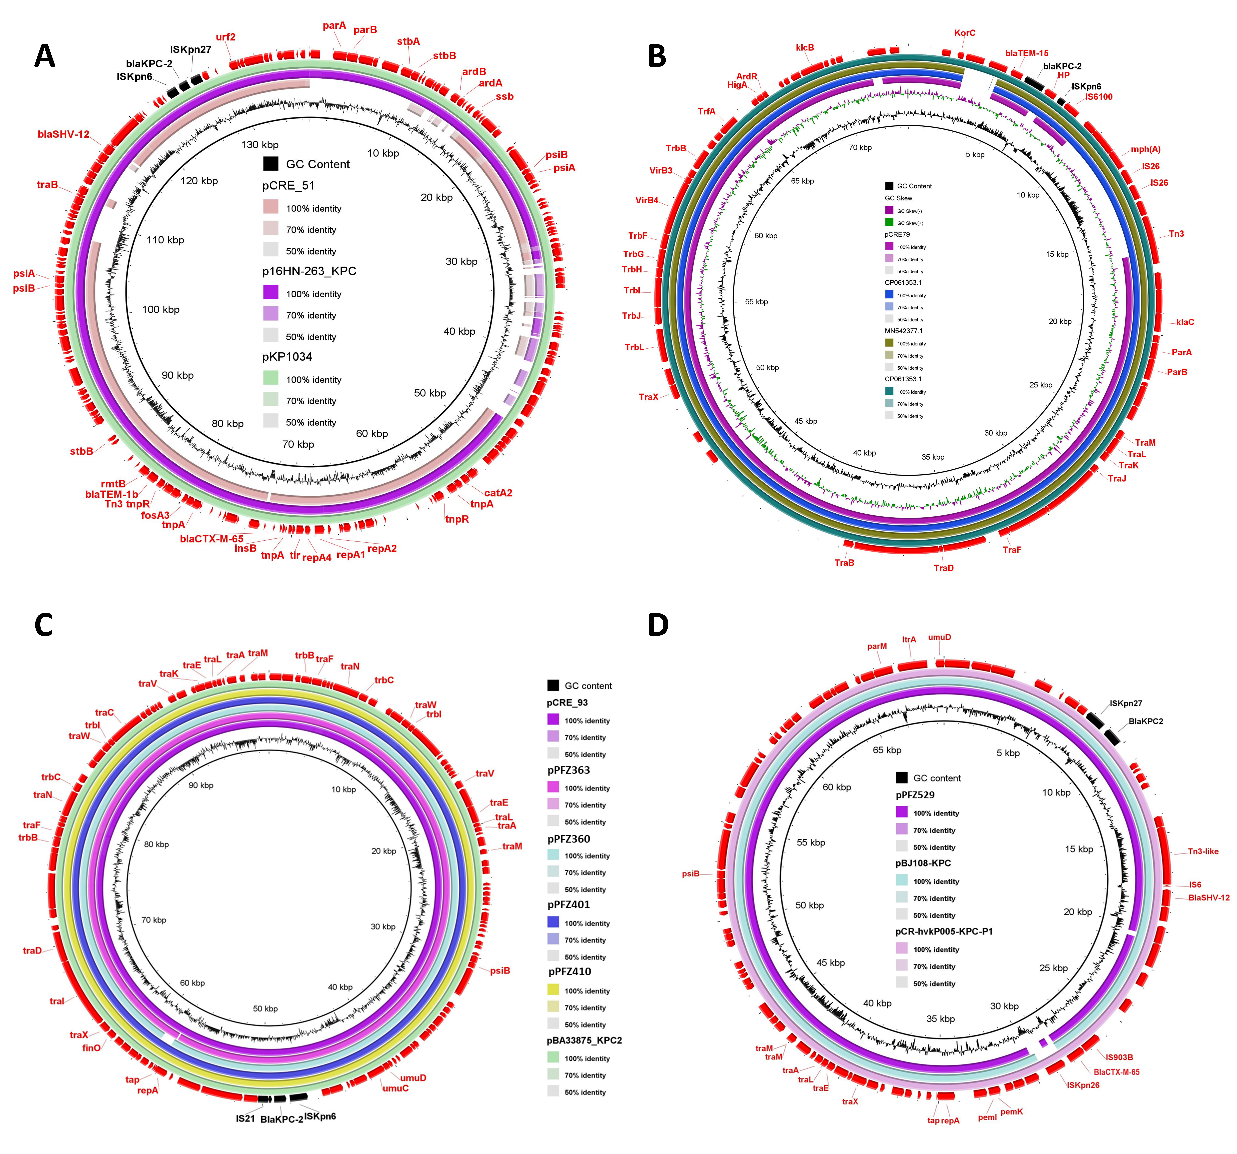

Supplement: Supplementary file 1 [file 995d78ca391ec8ae494bdb3f.docx]
